# Supplementary material for: Comparative Genomic Analysis of a Multidrug-Resistant Staphylococcus hominis ShoR14 Clinical Isolate from Terengganu, Malaysia, Led to the Discovery of Novel Mobile Genetic Elements
Source: Pathogens. 2022 Nov 23;11(12):1406. doi: 10.3390/pathogens11121406 (PMC9782665; doi:10.3390/pathogens11121406)
Supplement: Supplementary file 1 [file pathogens-11-01406-s001.zip › Supplementary tables.xlsx]

## Sheet: Table S1
Table S1. List of Staphylococcus hominis strains used to construct phylogenetic tree.
No.	Strain	Accession Number	Sequence Type, ST (subspecies, if specify)*	Isolation Source	Geographic Location (Country)	Collection Year	Publication Status**
1	Staphylococcus hominis strain MGYG-HGUT-02399	NZ_CABMJU000000000.1	ST65	Human gut	Not provided	Not provided	Unpublished
2	Staphylococcus hominis strain DE0521	NZ_VDUF00000000.1	Unknown	Environmental	USA	2018	Unpublished
3	Staphylococcus hominis strain NFPP34	NZ_FOBP00000000.1	Unknown	Not provided	Not provided	Not provided	Unpublished
4	Staphylococcus hominis strain UMB0272	NZ_PKIP00000000.1	ST67	Human Urine/catheter	USA	2015	Unpublished
5	Staphylococcus hominis strain 1H9	NZ_JAGSWT000000000.1	ST67	Cell culture	United kingdom	2016	Unpublished
6	Staphylococcus hominis strain HAA31	NZ_JAFFRS000000000.1	Unknown	Skin	Germany	2019	Unpublished
7	Staphylococcus hominis strain DE0153	NZ_VELT00000000.1	Unknown	Environmental	USA	2018	Unpublished
8	Staphylococcus hominis strain DE0581	NZ_VDTX00000000.1	Unknown	Environmental	USA	2018	Unpublished
9	Staphylococcus hominis strain 794_SEPI	NZ_JUSP00000000.1	Unknown	Not provided	USA	Not provided	Published (PUBMED 26230489), DOI: 10.1371/journal.pgen.1005413
10	Staphylococcus hominis strain FDAARGOS_136	NZ_CP014107.1	ST18	Peripheral blood	USA	2014	Unpublished
11	Staphylococcus hominis strain DE0605	NZ_VDTS00000000.1	ST18	Environmental	USA	2018	Unpublished
12	Staphylococcus hominis strain R6016	NZ_JACGOU000000000.1	ST47	Skin swab1381 from squamous cell carcinomas patient MST003	Australia	2016	Unpublished
13	Staphylococcus hominis strain APC 3824	NZ_SHFC00000000.1	ST1	Human/female milk	Ireland	Not provided	Unpublished
14	Staphylococcus hominis strain RIT612	NZ_RDSL00000000.1	Unknown	Mobile phone surface	USA	2018	Unpublished
15	Staphylococcus hominis strain As3	NZ_LFKS00000000.1	Unknown	Whole mosquito body	USA	2013	Published ( PUBMED 26966197), DOI: 10.1128/genomeA.00085-16
16	Staphylococcus hominis strain As2	NZ_LFKR00000000.1	Unknown	Whole mosquito body	USA	2012	Published ( PUBMED 26966197), DOI: 10.1128/genomeA.00085-16
17	Staphylococcus hominis strain As1	NZ_LFKQ00000000.1	Unknown	Whole mosquito body	USA	2013	Published ( PUBMED 26966197), DOI: 10.1128/genomeA.00085-16
18	Staphylococcus hominis strain FDAARGOS_745	NZ_CP050982.1	Unknown	Clinical isolate	USA	Unknown	Unpublished
19	Staphylococcus hominis strain 19A	NZ_CP031277.1	Unknown	Buffalo milk	Brazil	2014	Published (PUBMED 31753946), DOI: 10.1128/MRA.01264-19
20	Staphylococcus hominis strain DE0419	NZ_VDUV00000000.1	Unknown	Environmental	USA	2018	Unpublished
21	Staphylococcus hominis strain DE0165	NZ_VEEQ00000000.1	Unknown	Environmental	USA	2018	Unpublished
22	Staphylococcus hominis strain UFMG-H7B	NZ_JAAVMU000000000.1	Unknown	Urine/ host is Bosindicus	Brazil	2019	Unpublished
23	Staphylococcus hominis strain SH08_17	NZ_PHKL00000000.1	ST2	Blood	Brazil	2017	Unpublished
24	Staphylococcus hominis strain ZBW5	NZ_AKGC00000000.1	ST1 (Shh)	Skin swab sample	China	2011	Unpublished
25	Staphylococcus hominis strain MBF12-19J	NZ_JAGMUC000000000.1	Unknown (Shn)	Skin	Indonesia	2019	Unpublished
26	Staphylococcus hominis strain HAB38	NZ_JAFFRR000000000.1	ST73	Skin	Germany	2019	Unpublished
27	Staphylococcus hominis strain FDAARGOS_661	CP054550.1	Unknown	Clinical isolate	USA	Not provided	Unpublished
28	Staphylococcus hominis strain SNUC 5336	NZ_PZHX00000000.1	Unknown	Herd 314/ Mastitis	Canada	2008	Published (PUBMED 28066335), DOI: 10.3389/fmicb.2016.01990
29	Staphylococcus hominis strain 1288_SEPI	NZ_JVVJ00000000.1	Unknown	Not provided	USA	Not provided	Published (PUBMED 26230489), DOI: 10.1371/journal.pgen.1005413
30	Staphylococcus hominis strain K1	NZ_CP020618.1	Unknown (Shh)	Bovine milk	India	2014	Unpublished
31	Staphylococcus hominis strain NCTC7802	NZ_UHDX00000000.1	Unknown	Nail (Handler of pressed Beef)	Not provided	1900/1948	Unpublished
32	Staphylococcus hominis strain FDAARGOS_746	NZ_CP046306.1	Unknown	Clinical isolate	USA	Unknown	Unpublished
33	Staphylococcus hominis strain DE0222	NZ_VELG01000001.1	Unknown	Environmental	USA	2018	Unpublished
34	Staphylococcus hominis strain DE0337	NZ_VEKF00000000.1	Unknown	Environmental	USA	2018	Unpublished
35	Staphylococcus hominis strain FDAARGOS_748	NZ_CP054883.1	Unknown	Clinical isolate	USA	Unknown	Unpublished
36	Staphylococcus hominis Hudgins	NZ_MAYR00000000.1	Unknown	human skin	USA	2015	Unpublished
37	Staphylococcus hominis strain FDAARGOS_747	NZ_CP046301.1	Unknown	Clinical isolate	USA	Unknown	Unpublished
38	Staphylococcus hominis strain C80	NZ_ACRM00000000.1	Unknown (Shh)	Not provided	Not provided	Not provided	Unpublished
39	Staphylococcus hominis strain NCTC 11320	NZ_UHDM00000000.1	ST26 (Shh)	Skin	Not provided	1900/1979	Unpublished
40	Staphylococcus hominis strain FDAARGOS_575	NZ_CP033732.1	ST26	Clinical isolate	Not provided	Unknown	Unpublished
41	Staphylococcus hominis strain SK119	NZ_ACLP00000000.1	ST3	Not provided	Not provided	Not provided	Unpublished
42	Staphylococcus hominis strain FDAARGOS_762	NZ_CP054006.1	ST3	Skin isolate	USA	Unknown	Unpublished
43	Staphylococcus hominis strain DE0218	NZ_VELH00000000.1	Unknown	Environmental	USA	2018	Unpublished
44	Staphylococcus hominis strain DE0225	NZ_VELF00000000.1	Unknown	Environmental	USA	2018	Unpublished
45	Staphylococcus hominis strain DE0167	NZ_VELR00000000.1	Unknown	Environmental	USA	2018	Unpublished
46	Staphylococcus hominis strain B10	NZ_FBVK00000000.1	Unknown	Skin isolate	Not provided	Not provided	Unpublished
47	Staphylococcus hominis strain DE0490	NZ_VDUK00000000.1	Unknown	Environmental	USA	2018	Unpublished
48	Staphylococcus hominis strain DE0132	NZ_VELW00000000.1	Unknown	Environmental	USA	2018	Unpublished
49	Staphylococcus hominis strain J27	NZ_FBVM00000000.1	Unknown	Skin isolate	Not provided	Not provided	Unpublished
50	Staphylococcus hominis strain J23	NZ_FBVI00000000.1	Unknown	Skin isolate	Not provided	Not provided	Unpublished
51	Staphylococcus hominis strain J11	NZ_FBVJ00000000.1	Unknown	Skin isolate	Not provided	Not provided	Unpublished
52	Staphylococcus hominis strain J6	NZ_FBVH00000000.1	Unknown	Skin isolate	Not provided	Not provided	Unpublished
53	Staphylococcus hominis strain ShoR14	JAGHKT000000000	ST1 (possible Shh)	Blood	Malaysia	2016	Present study
* S. hominis subsp. hominis (Shh); S. hominis subsp. novobiosepticus (Shn)
** Publication status refer to NCBI-GenBank and PubMed database (accessed on 17 November 2022)

## Sheet: Table S2
Table S2. Genomic islands (GIs) of Staphylococcus hominis strain FDAARGOS_136 (CP014107.1).
Locus tags highlighted in yellow are absent from ShoR14 genome
Gene name	Gene ID	Locus	Product
GI-1
AUW63027.1	lacG	AL495_06085	6-phospho-beta-galactosidase
		AL495_06090	PTS lactose transporter subunit IIBC
AUW63028.1		AL495_06095	hypothetical protein
AUW63029.1		AL495_06100	ImmA/IrrE family metallo-endopeptidase
AUW63030.1		AL495_06105	hypothetical protein
AUW63998.1		AL495_06110	restriction endonuclease
AUW63031.1		AL495_06115	DUF2075 domain-containing protein
AUW63999.1		AL495_06120	DUF4041 domain-containing protein
AUW63032.1		AL495_06125	hypothetical protein
AUW63033.1		AL495_06130	hypothetical protein
AUW63034.1		AL495_06135	stage II sporulation protein M
AUW63035.1		AL495_06140 absent also from FDAARGOS_745, 19A and K1 strains	DUF523 domain-containing protein
AUW63036.1		AL495_06145	hypothetical protein
AUW63037.1		AL495_06150	transcriptional regulator
AUW63038.1		AL495_06155	RNA polymerase subunit sigma-70
AUW63039.1		AL495_06160 absent also from FDAARGOS_745, 19A and FDAARGOS_746 strains	pathogenicity island protein
AUW63040.1		AL495_06165	hypothetical protein
AUW63041.1		AL495_06170	DNA replication protein DnaC
AUW63042.1		AL495_06175	DnaD domain protein
AUW63043.1		AL495_06180 absent also from FDAARGOS_746, 19A and K1 strains	helix-turn-helix domain-containing protein
AUW63044.1		AL495_06185 absent also from FDAARGOS_745 and 19A strains	pathogenicity island protein
AUW63045.1		AL495_06190	hypothetical protein
AUW63046.1		AL495_06195	hypothetical protein
AUW63047.1		AL495_06200 absent also from FDAARGOS_746, 19A and K1 strains	phage repressor protein
AUW63048.1		AL495_06205	DNA-binding protein
AUW63049.1		AL495_06210	hypothetical protein
AUW63050.1		AL495_06215	XRE family transcriptional regulator
AUW63051.1		AL495_06220	site-specific integrase
		AL495_06225	hypothetical protein
AUW63052.1		AL495_06230	PTS lactose transporter subunit IIA
AUW63053.1	lacD	AL495_06235	tagatose 1,6-diphosphate aldolase
AUW63054.1		AL495_06240	tagatose-6-phosphate kinase
AUW63055.1	lacB	AL495_06245	galactose-6-phosphate isomerase subunit LacB
AUW63056.1	lacA	AL495_06250	galactose-6-phosphate isomerase subunit LacA
AUW63057.1		AL495_06255	DeoR family transcriptional regulator
AUW63058.1		AL495_06260	NAD-dependent protein deacylase
AUW63059.1		AL495_06265	30S ribosomal protein S9
AUW63060.1		AL495_06270	50S ribosomal protein L13
AUW63061.1		AL495_06275	tRNA pseudouridine(38-40) synthase TruA
AUW63062.1		AL495_06280	energy-coupling factor transporter transmembrane protein EcfT
AUW63063.1		AL495_06285	energy-coupling factor transporter ATPase
AUW63064.1		AL495_06290	energy-coupling factor transporter ATPase
AUW63065.1		AL495_06295	50S ribosomal protein L17
AUW63066.1		AL495_06300	DNA-directed RNA polymerase subunit alpha
AUW63067.1		AL495_06305	30S ribosomal protein S11
AUW63068.1		AL495_06310	30S ribosomal protein S13
AUW63069.1		AL495_06315	50S ribosomal protein L36
AUW63070.1		AL495_06320	translation initiation factor IF-1
AUW63071.1		AL495_06325	adenylate kinase
AUW63072.1		AL495_06330	preprotein translocase subunit SecY
AUW63073.1		AL495_06335	50S ribosomal protein L15
AUW63074.1		AL495_06340	50S ribosomal protein L30
AUW63075.1		AL495_06345	30S ribosomal protein S5
AUW63076.1		AL495_06350	50S ribosomal protein L18
AUW63077.1		AL495_06355	50S ribosomal protein L6
AUW63078.1		AL495_06360	30S ribosomal protein S8
AUW63079.1		AL495_06365	30S ribosomal protein S14 type Z
AUW63080.1		AL495_06370	50S ribosomal protein L5
AUW63081.1		AL495_06375	50S ribosomal protein L24
AUW63082.1		AL495_06380	50S ribosomal protein L14
AUW63083.1		AL495_06385	30S ribosomal protein S17
AUW63084.1		AL495_06390	50S ribosomal protein L29
AUW63085.1		AL495_06395	50S ribosomal protein L16
AUW63086.1		AL495_06400	30S ribosomal protein S3
AUW63087.1		AL495_06405	50S ribosomal protein L22
AUW63088.1		AL495_06410	30S ribosomal protein S19
AUW63089.1		AL495_06415	50S ribosomal protein L2
AUW63090.1		AL495_06420	50S ribosomal protein L23
AUW63091.1		AL495_06425	50S ribosomal protein L4
AUW63092.1		AL495_06430	50S ribosomal protein L3
AUW63093.1		AL495_06435	30S ribosomal protein S10
AUW63094.1		AL495_06440	hypothetical protein
AUW63095.1		AL495_06445	guanine permease
AUW63096.1		AL495_06450	DNA topoisomerase III
GI-2
AUW64007.1		AL495_08150	hypothetical protein
AUW63413.1	blaI	AL495_08155	penicillinase repressor BlaI
AUW63414.1	blaR1	AL495_08160	beta-lactam sensor/signal transducer BlaR1
AUW63415.1		AL495_08165	penicillin-hydrolyzing class A beta-lactamase BlaZ
AUW63416.1		AL495_08170	YolD-like family protein
AUW63417.1		AL495_08175	hypothetical protein
AUW63418.1		AL495_08180	transposase
AUW64008.1		AL495_08185	transposase
AUW63419.1		AL495_08190	transposase
		AL495_08195	YolD-like family protein
AUW63420.1		AL495_08200	hypothetical protein
GI-3
AUW63500.1		AL495_08620	YitT family protein
AUW63501.1		AL495_08625 absent from FDAARGOS_745 strain	IS6-like element IS257 family transposase
AUW63502.1		AL495_08630	transposon DNA-invertase
AUW63503.1		AL495_08635 absent from FDAARGOS_745,FDAARGOS_746 and K1 strains	hypothetical protein
AUW63504.1		AL495_08640	alcohol dehydrogenase
		AL495_08645	HxlR family transcriptional regulator
AUW64010.1		AL495_08650	daunorubicin resistance protein DrrC
		AL495_08655	glucose-6-phosphate dehydrogenase
AUW64011.1		AL495_08660	stage II sporulation protein M
AUW63505.1		AL495_08665 absent from FDAARGOS_745, FDAARGOS_746 and K1 strains	hypothetical protein
AUW63506.1		AL495_08670 absent from FDAARGOS_745,FDAARGOS_746 and K1 strains	hypothetical protein yes correct
AUW63507.1		AL495_08675 absent from FDAARGOS_745,FDAARGOS_746 and K1 strains	XRE family transcriptional regulator
AUW63508.1		AL495_08680	hypothetical protein
AUW63509.1		AL495_08685	hypothetical protein
GI-4
AUW63597.1		AL495_09185 absent from FDAARGOS_745, FDAARGOS_746, K1 and 19A strains	hypothetical protein
AUW63598.1		AL495_09190	hypothetical protein
AUW63599.1		AL495_09195	hypothetical protein
AUW63600.1		AL495_09200	hypothetical protein
AUW63601.1		AL495_09205	hypothetical protein
AUW63602.1		AL495_09210	hypothetical protein
AUW63603.1		AL495_09215	hypothetical protein
AUW63604.1		AL495_09220 absent also from FDAARGOS_745, FDAARGOS_746, 19A and K1 strains	site-specific DNA-methyltransferase
AUW64015.1		AL495_09225 absent also from FDAARGOS_745, FDAARGOS_746, 19A and K1 strains	hypothetical protein
AUW63605.1		AL495_09230	23S rRNA (pseudouridine(1915)-N(3))-methyltransferase RlmH
AUW64016.1		AL495_09235	MBL fold metallo-hydrolase
AUW63606.1		AL495_09240	hypothetical protein
AUW63607.1		AL495_09245	hypothetical protein
AUW63608.1	walK	AL495_09250	cell wall metabolism sensor histidine kinase WalK
AUW63609.1		AL495_09255	DNA-binding response regulator
AUW63610.1		AL495_09270	adenylosuccinate synthase
AUW63611.1		AL495_09275	replicative DNA helicase
AUW63612.1		AL495_09280	50S ribosomal protein L9
AUW63613.1		AL495_09285	DHH family phosphoesterase
AUW63614.1		AL495_09290	DUF2232 domain-containing protein
AUW63615.1		AL495_09295	homoserine acetyltransferase
AUW63616.1		AL495_09300	AzlD domain-containing protein
AUW63617.1		AL495_09305	branched-chain amino acid ABC transporter permease
AUW63618.1		AL495_09310	serine--tRNA ligase
AUW63619.1		AL495_09315	NAD(P)H-hydrate dehydratase
AUW63620.1		AL495_09320	DNA gyrase subunit A
AUW63621.1	gyrB	AL495_09325	DNA topoisomerase (ATP-hydrolyzing) subunit B
AUW63622.1		AL495_09330	DNA replication and repair protein RecF
AUW63623.1	yaaA	AL495_09335	S4 domain-containing protein YaaA
AUW63624.1		AL495_09340	DNA polymerase III subunit beta
AUW63625.1		AL495_09345	chromosomal replication initiator protein DnaA
GI-5 :
AUW64017.1		AL495_09435	RimJ/RimL family protein N-acetyltransferase
AUW63643.1	merR	AL495_09440 absent from FDAARGOS_745, FDAARGOS_746, and K1 strains	Hg(II)-responsive transcriptional regulator
AUW63644.1	merA	AL495_09445 absent from FDAARGOS_745,FDAARGOS_746, and K1 strains	mercury(II) reductase
AUW63645.1		AL495_09450 absent from FDAARGOS_745,FDAARGOS_746, and K1 strains	ISL3 family transposase
AUW63646.1		AL495_09455 absent from FDAARGOS_745,FDAARGOS_746, and K1 strains	TetR/AcrR family transcriptional regulator

## Sheet: Table S3
Table S3: Antimicrobial concentration and interpretative values for ShoR14.
Disk diffusion test
Antimicrobial class	Antibiotic	Disk content	Interpretative categories and Zone diameter breakpoints (mm)					ShoR14 profile
					Sensitive (S)	Intermediate (I)	Resistance (R)	(S/I/R)
β-lactams	Penicillin	10 units			≥ 29	-	≤ 28	R
	Oxacillin	1 µg			≥ 13	11 - 12	≤ 10	R
	Cefoxitin	30 µg			≥ 22	-	≤ 21	R
	Cefoperazone	75 µg			≥ 21	16 - 20	≤ 15	S
Fluoroquinolones	Ciprofloxacin	5 µg			≥ 21	16 - 20	≤ 15	R
	Moxifloxacin	5 µg			≥ 24	21 - 23	≤ 20	I
Macrolides	Erythromycin	15 µg			≥ 23	14 - 22	≤ 13	R
Lincosamides	Clindamycin	2 µg			≥ 21	15 - 20	≤ 14	R
Aminoglycosides	Gentamicin	10 µg			≥ 15	13 - 14	≤ 12	R
	Amikacin	30 µg			≥ 18	-	< 18	S
Folate inhibitors	Co-trimoxazole	25 µg			≥ 16	11 - 15	≤ 10	R
Fucidanes	Fusidic acid	10 µg			≥ 24	-	< 24	R
Tetracyclines	Tetracycline	30 µg			≥ 19	15 - 18	≤ 14	R
	Minocycline	30 µg			≥ 19	15 - 18	≤ 14	S
	Doxycycline	30 µg			≥ 16	13 - 15	≤ 12	I
Glycylcyclines	Tigecycline	15 µg			≥ 18	-	< 18	S
Phenicols	Chloramphenicol	30 µg			≥ 18	13 - 17	≤ 12	R
Monoxycarbolic acid	Mupirocin	5 µg			≥ 14	-	≤ 13	R
Ansamycins	Rifampin	5 µg			≥ 20	17 - 19	≤ 16	S
Aminocoumarin	Novobiocin	5 µg			≥ 16	-	≤ 12	S
Glycopeptides	Vancomycin	30 µg			≥ 17	15 - 16	≤ 14	S
	Teicoplanin	30 µg			≥ 14	11 - 13	≤ 10	S
Oxazolidinones	Linezolid	30 µg			≥ 21	-	< 21	S
Phosphonic acids	Fosfomycin	200 µg			≥ 16	13 - 15	≤ 12	S
Streptogramins	Quinupristin-dalfopristin	15 µg			≥ 19	16 - 18	≤ 15	S
Anti-MRSA cephalosporins	Ceftaroline	30 µg			≥ 24	21 - 23	≤ 20	S
D-test*								cMLSB
*cMLSB = Constitutive MLSB phenotype.

## Sheet: Table S4
Table S4. List of primers used in this study for gap closure.
Primer (5' to 3')	Description
F: CGAGTGTCACAGTGATTATAGTTG	Used to validate validate/close gap in pShoR14-1
R: GGGTTGATGATATGAAGAGTGTG
F: GTGGAATCCCAAGTATTTGTTTG
R: GCTCGATTAATGTTAGTCACTC
F: GTCCGAGCGATAGTGAAAAC
R: CGAATGGGGTGATTTATTCAAG
F: GCAATGTTTAGATACATTAATCGC
R: GTGAAATTAGAAGCTCCTATGAG
F: GTCTACATTAGCCCAACCATC
R: GATTCAAAAGCCAATGAAAGGC
F: GTGTTACCTTCCGGAATTGG
R: GAAAGTTGCTACTAGTGCTC
F: AGCATGAATAACACCTCCTCTCTG	Used to validate/close gap in pShoR14-2
R: GATAGTAGCCAACGGCTACAGT
F: TGCGCTTTCAGTTGTTCAATTTG	Used to validate/close gap in pShoR14-5
R: TGATAATAGGGAGGTAGAACCACC
F: ATGCCCTTTTCCTGAGCC	Used to validate/close gap in pShoR14-6
R: ACCTCTTACTCGAATTTGGGAAC
